# Supplementary material for: Establishment of a versatile cell line for juvenile hormone signaling analysis in Tribolium castaneum
Source: PubMed Central journal article supplement — Sci Rep. 2013 Mar 28;3:1570. doi: 10.1038/srep01570 (PMC3610134; doi:10.1038/srep01570), 2013-03-28
Supplement: srep01570-s1.pdf [file srep01570-s1.pdf]

Supplementary information

**Establishment of a versatile cell line for juvenile hormone signaling  
analysis in *Tribolium castaneum***

Takumi Kayukawa, Ken Tateishi & Tetsuro Shinoda

4 Supplementary Figures

3 Supplementary Tables

**A**

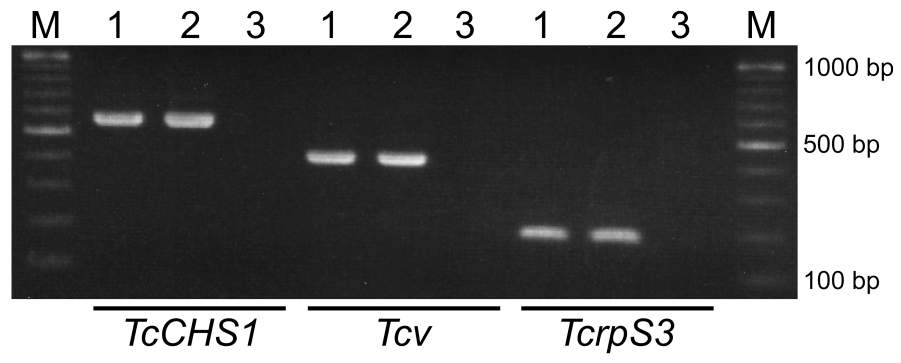

**B**

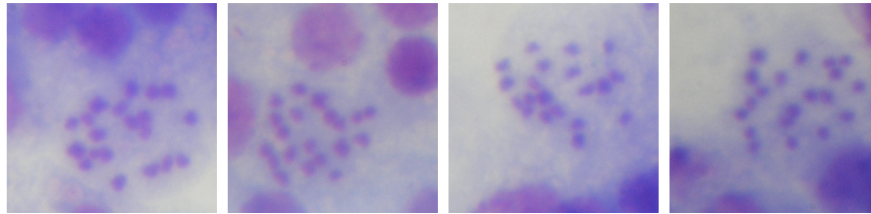

**Supplementary Figure S1. Characterization of the Tc81 cell line.** (A) PCR characterization of Tc81 cells. Genomic DNA was extracted from whole bodies of *T. castaneum* larvae and Tc81 cells using DNAzol Reagent (Invitrogen) and amplified by PCR with primer sets specific for 3 representative *T. castaneum* genes. Primers and PCR conditions were the same as described by Goodman et al.<sup>1</sup> (M) 100 bp DNA ladder; (1) PCR product amplified from larval genomic DNA; (2) PCR product amplified from Tc81 cell genomic DNA; (3) PCR product amplified from water (no template negative control). *TcCHS1*, *chitin synthase 1*; *Tcv*, *tryptophan oxygenase V*; *TcrpS3*, *ribosomal protein S3*. (B) Typical metaphase chromosomes of Tc81 cells. Karyotype analysis of Tc81 cells was performed essentially according to the methods of Mitsuhashi<sup>2</sup>.

1 Goodman, C. L., et al. A cell line derived from the red flour beetle *Tribolium castaneum* (Coleoptera: Tenebrionidae). *In Vitro Cell. Dev. Biol. Anim.* **48**, 426-433 (2012).

2 Mitsuhashi, J. Compositions of salt solutions and culture media. in *Invertebrate Tissue Culture Methods* (ed Mitsuhashi, J.). 401-420 (Springer Lab Manual, Tokyo 2002).





**Supplementary Figure S2. Alignment of SRC protein sequences.** Alignment of the predicted amino acid sequences of TcSRC with *D. melanogaster* Taiman (DmTai, AAG16637), *A. aegypti* FISC (AaFISC, ABE99837), and *B. mori* SRC (BmSRC, AB703620). The bHLH and PAS domains are indicated by lines, red letters represent the LXXLL motifs, and the polyQ domains are boxed (purple)<sup>3</sup>. Black shading indicates identical amino acid residues.

<sup>3</sup> Zhu, J. S., Chen, L., Sun, G. Q. & Raikhel, A. S. The competence factor beta Ftz-F1 potentiates ecdysone receptor activity via recruiting a p160/SRC coactivator. *Mol. Cell. Biol.* **26**, 9402-9412 (2006).

**A**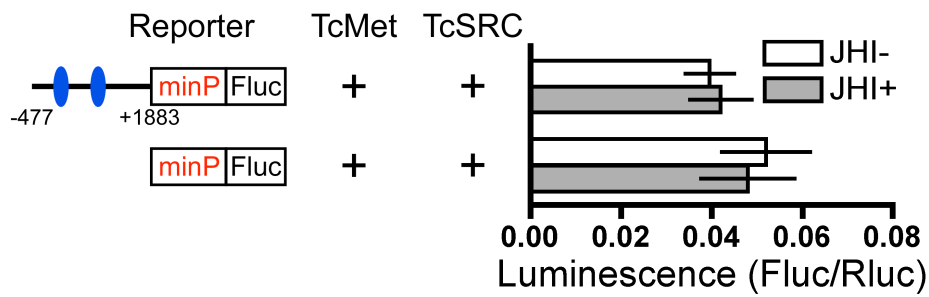**B**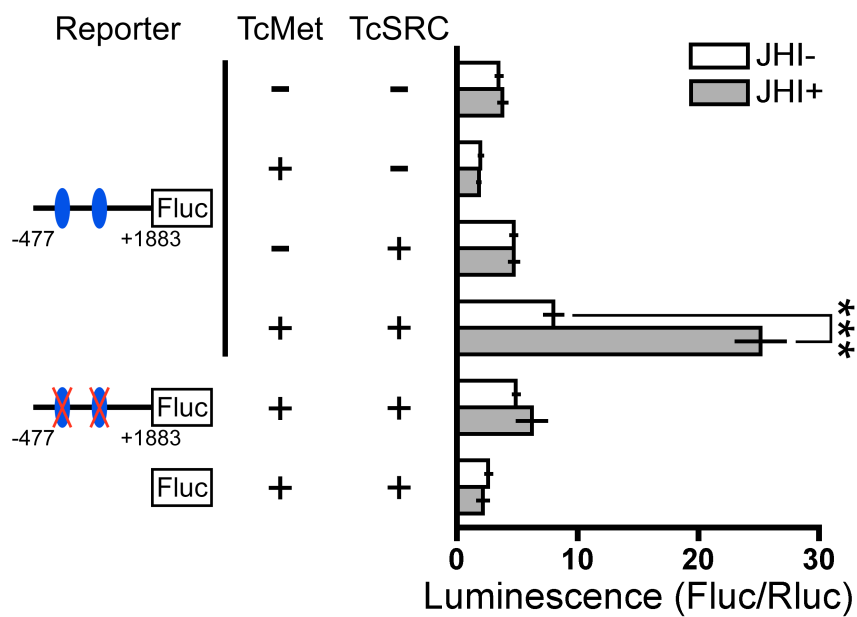

**Supplementary Figure S3. Functional analysis of *TcMet*, *TcSRC*, and *kJHRE* in mammalian HEK293 cells and *Drosophila* S2 cells.** (A) The *kJHRE*-reporter vector (-477 to +1883, pGL4.14) was modified for mammalian cells; the mammalian minimal promoter (minP) (pGL4.27, Promega) was inserted into the region between *kJHRE* and the firefly luciferase gene. HEK293 cells were cotransfected with the modified *kJHRE*-reporter vector (-477 to +1883 and minP, pGL4.14) and a plasmid expressing the full ORF of *TcMet* and/or *TcSRC*. Cells were then treated with 0.1  $\mu$ M JH III for 24 h. (B) S2 cells were cotransfected with a *kJHRE*-reporter vector (-477 to +1883, pGL4.14) and a plasmid expressing the full ORF of *TcMet* or *TcSRC* in the same manner as that applied for Tc81 cells. Cells were then treated with 0.1  $\mu$ M JH III for 24 h. Xs indicate mutations in the *kJHREc* reporter. (A, B) Reporter activity was examined using a dual-luciferase reporter assay system. Data represent means  $\pm$  SDs (n = 3). Data were analyzed by Student's *t*-tests ( $***P < 0.001$ ;  $**P < 0.01$ ;  $*P < 0.05$ ; not indicated,  $P > 0.05$ ).

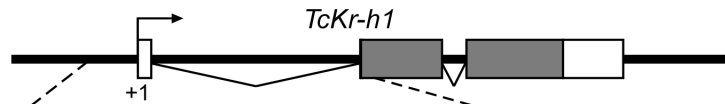

-477 GTTGCACCTCGCTAATTACCTCAACCAGATAACAAACAACAAAAATAAGACACCGATAAA  
 ATGATAAATTACCTCGTGCCAGGTTTAGCCCGGCCTAGGCTTACCCAAACCTGGGT  
 CAACTTTTGGGACCTGACCCAGGCCACGCATAAAATTAATTAACCCATCGATCGTTGC  
 TATGATAACGCACAACAATTCAAATAAAAACCAACCGCCAAACGCTCCTCTTTATCGAC  
 TCGCATAATAATCGCGATACCGTTCGCTTGCAAATATGTTTATTAACACAAACGAATCC  
 AAAATCCCTAGTACTTC GCCTCCACGTG CCGTTTCAACACGGGCCAGACTGTTCCGGCA  
*kJHREc*

TCTAGTGGGCGAGAAGAGTGCGGGGAAGGACGCAAACATCCGATCGGCCCTCATCG  
 GCACCCACCGCAACAGCCGAACGCGCGGAGGTAACATTTAGTTTGATTTTAGCCC

+1 Transcription start site

AACCAAGTGTAGC AGTGAGAAGAAAAATTGCCATTGAATAACACCACCAAGTGCTATT  
TCACTATCATTCAATTGGACACAACCCCATGGCACACACAGGTCTCCAAACCTGAGAA  
ATT GTAAGTTTTTATTTTACTTATCAAAAATTTCTTTTTTCTGGGCTTGGGTTGGTAC  
 GGCTTGCATCGCCACCGCGATAAGGGTAAAGTATCAAAAATGTGACAGGACGCGTCA  
 AAAACGGCCAAAATGTCATTGAGTAAATAAAAATGCGTGCGTTGTGGGCCGGCGCGG  
 GTGTTTGGGGGGCGCAGGGGGCGCTCTAACTCACGACCTACGTCTCTCTAGGTTGTC  
 GAGGTCGGTGATCGTTGTA AAAAACCGGCCGACACTC CACGTGGAGGC GAATGACTT  
*kJHREc*

Exon 1

GGGCACGCACGCTCGTGCCTCTAACTCAGCCTTGTCTATAGCGAGTGAGCGGCCTC  
 GCTTTAAACGCCACAGTTGTTTCGCCTCGATGCATCGCCTCCTCGTGCCGTTCTGTTTAG  
 TTGTTTTGGCCTGACCAATCAACGTTTATTATAAATAGAACGCGTTGCCTTCTGTCAATTT  
 ATTATAAACAATCGGCGGCCGTTTTGACGTTTTTTTCGCTCATCATGACCTACCTTGCGA  
 TTGAATTGGGGTGCCTTCTGTTGACTCCGGGTTGTCTTTTCGGGGGGTCAAAAACCGC  
 CCGCTACCCACCTACGCAATGCACACGCACGGGGCGGGGCCCATCATCAACGC  
 ACTCGCACTTGTCCCCTGCATTGTTATAGTGCACCTGGAGGCAGTGCCTTCCGGGAC  
 GTCTTGATGTGTTGTTTGGGTTTCGTTTCATTTGTAATGGCTCAGAAAAGTGCTGATGGT  
 GGTGATAAGGTGCAGGAGGTTTTTATCAAAAATTTATTCATGAGGTGCAAGGAGGAAC  
 GGAGCGGTGCGTTTTCTTTTTTATTTATTTTCTTATTTGAAATTTCCATTTTTTCTCGT  
 TTGACTTGGTATTTTTAGCATAATATTACGTAACCTGATAATGAACTGCATGAAATCG  
 CTCATTCCGTACTTGCAGTCATGCGAATTTAACGGTTATAAAGGGTGAGTTGTTAAGA  
 ATTTAAATACTCAATGTAATAATCAAAATGGTTGAGTCAATTGTAAGATCAAAGTAACTG  
 AGTAAAAAATATTTTTATAAACAGTTTCGCAGTAGATAGTGATAAGGAAAAAGGCGT  
 CAAAAATTAATCAGGTGATAAGTGTATGATTTTTCAAGTACAAAAATAACGTCACCATTCT  
 GTAGGAGAAATTTTTCTTTAATTTTTCTCGATCAAAGAGGTCTCTGACTGAAATTAAG  
 TTTGCAACTTCGGCTACCAGTTCCAAACGTCACACTTTTAATCGTTGATTTCAAAAACA  
 CAGGCAACTATTAGATTACATTTAAGAAATTTGCGTAATAATTGAGTTTTTGCTGAAT  
 AAACATTTAGGAAATATAAATTTTTGCTTATTTTCCACCAAATTCGCCGGCGATTTTTTC  
 GTTCTAGTTTTATAAAAACAGGGTAAAAAACTAAAAGTATAGGAAAGGTTAATTAAG  
 TCCGTGAAAATTACCAAGTCAAATTTTTGATGATAAAATTGATAACAACTCATGATGGT  
 CGCCTGAAGCACAATGTTTTGCAAATTTTCATGAATCGTTGTTTCAATTTGAACTTGA  
 AACTCATTTATTTTCGCTAATTTTTGTTAATAAATTTATTTCCGAAATAGTGAGAATGTT

Translation start site

TGTTTCGTTTCAG AGACTCCTTGGCAAATGCCGGAAATGGTCCGTTATTACACCGAAG  
ACCCCTTGGCCATAGCCCTGTTTCTACCGTTGACGAAGCCCGTCTTTCAGTAAAGAA  
AGTCGTCTGCAGCCCCG +1883

Exon 2

**Supplementary Figure S4. Nucleotide sequences of the upstream region and first intron of *TcKr-h1*.** The sequences are shown below the genomic structure of *TcKr-h1*. Boxed sequences indicate exons, bolded text indicates the translation start site (ATG), and red sequences represent *kJHREcs*. Numbers indicate distances from the transcription start site.

**Supplementary Table S1. List of primers used for cDNA cloning and construction of expression plasmids**

| Plasmid name                 | Construction method | PCR template                             | Primer name        | Nucleotide sequence (5' to 3')       |
|------------------------------|---------------------|------------------------------------------|--------------------|--------------------------------------|
| pCR4Blunt-TOPO_TcSRC_RTPCR   | PCR, ligation       | RLM RACE cDNA (whole body)               | TcSRC_RTPCR_FW     | GCAGCGAGTCGACGACGACGACG              |
|                              |                     |                                          | TcSRC_RTPCR_RV     | CCATGACCTGGTCCAGGATGTCCG             |
| pCR4Blunt-TOPO_TcSRC_5' RACE | RLM RACE            | RLM RACE cDNA (whole body)               | TcSRC_5'RACE_RV1   | GGAAATAACTTTGTCCCTGTGCCAAATCCTG      |
|                              |                     | TcSRC_5'RACE 1 <sup>st</sup> PCR product | TcSRC_5'RACE_RV2   | CCGACACCGACACTTGGTCTCTCAG            |
| pCR4Blunt-TOPO_TcSRC_3' RACE | RLM RACE            | RLM RACE cDNA (whole body)               | TcSRC_3'RACE_FW1   | GAACAGCATGCACCACCAAGCAACG            |
|                              |                     | TcSRC_3'RACE 1 <sup>st</sup> PCR product | TcSRC_3'RACE_FW2   | CTCAAGTGGATTCTGGTTCACACCTCG          |
| pCR4Blunt-TOPO_TcSRC_ORF     | PCR, ligation       | RLM RACE cDNA (whole body)               | TcSRC_ORF_FW       | ATGAGCGCCTTGGCCACCGGTGTC             |
|                              |                     |                                          | TcSRC_ORF_RV       | TCACTCGGACAGCAGCTTCTGCAGCAG          |
| pBIND_TcMet                  | PCR, ligation       | pGEM-T_TcMet *                           | TcMet_pBIND_FW     | TTTGGATCCGTATGTTAGCTCCTTGTGAACCTATAC |
|                              |                     |                                          | TcMet_pBIND_RV     | AAAACGCGTTCATACTTTGTTACGAAGTAGTTGGTC |
| pBIND_TcSRC                  | PCR, ligation       | pCR4Blunt-TOPO_TcSRC_ORF                 | TcSRC_pBIND_FW     | TTTGCGGCCGCAATGAGCGCCTTGGCCACCG      |
|                              |                     |                                          | TcSRC_pBIND_RV     | AAAGGTACCTCACTCGGACAGCAGCTTCTG       |
| pBIND_TcMet Δ GAL4DBD        | Inverse PCR         | pBIND_TcMet                              | TcMet_pBINDiPCR_FW | ATGTTAGCTCCTTGTGAACCTATACCAACTC      |
|                              |                     |                                          | TcMet_pBINDiPCR_RV | CTTTCAGGAGGCTTGTCAAGCTGGC            |
| pBIND_TcSRC Δ GAL4DBD        | Inverse PCR         | pBIND_TcSRC                              | TcSRC_pBINDiPCR_FW | ATGAGCGCCTTGGCCACCGGTGTC             |
|                              |                     |                                          | TcSRC_pBINDiPCR_RV | CTTTCAGGAGGCTTGTCAAGCTGGC            |
| pACT_TcMet                   | PCR, ligation       | pGEMT_TcMet                              | TcMet_pACT_FW      | TTTGGATCCGTATGTTAGCTCCTTGTGAACCTATAC |
|                              |                     |                                          | TcMet_pACT_RV      | AAAACGCGTTCATACTTTGTTACGAAGTAGTTGGTC |
| pACT_TcSRC                   | PCR, ligation       | pCR4Blunt-TOPO_TcSRC_ORF                 | TcSRC_pACT_FW      | TTTGCGGCCGCAATGAGCGCCTTGGCCACCG      |
|                              |                     |                                          | TcSRC_pACT_RV      | AAAGGTACCTCACTCGGACAGCAGCTTCTG       |
| pACT_TcMet Δ VP16AD          | Inverse PCR         | pACT_TcMet                               | TcMet_pACTiPCR_FW1 | ATGTTAGCTCCTTGTGAACCTATACCAACTC      |
|                              |                     |                                          | TcMet_pACTiPCR_RV1 | CTTTCAGGAGGCTTGTCAAGCTGGC            |
| pACT_TcSRC Δ VP16AD          | Inverse PCR         | pACT_TcSRC                               | TcSRC_pACTiPCR_FW1 | ATGAGCGCCTTGGCCACCGGTGTC             |
|                              |                     |                                          | TcSRC_pACTiPCR_RV1 | CTTTCAGGAGGCTTGTCAAGCTGGC            |
| pACT_TcMet_C-terminal_VP16AD | PCR, ligation       | pACT_TcMet Δ VP16AD                      | TcMet_pACTiPCR_FW2 | GGTACCTGAATAACTAAGGCCGCTTCCC         |
|                              |                     |                                          | TcMet_pACTiPCR_RV2 | TACTTTGTTACGAAGTAGTTGGTCATGCTGATATAC |
|                              |                     | pACT                                     | VP16AD_FW1         | ATGAAGCTACTGTCTTCTATCGAACAAAGCATGC   |
|                              |                     |                                          | VP16AD_RV1         | TTATCCCGACCCGGGAATCCCC               |
| pACT_TcSRC_C-terminal_VP16AD | PCR, ligation       | pACT_TcSRC Δ VP16AD                      | TcSRC_pACTiPCR_FW2 | GGTACCTGAATAACTAAGGCCGCTTCCC         |
|                              |                     |                                          | TcSRC_pACTiPCR_RV2 | CTCGGACAGCAGCTTCTGCAGCAGC            |
|                              |                     | pACT                                     | VP16AD_FW1         | ATGAAGCTACTGTCTTCTATCGAACAAAGCATGC   |
|                              |                     |                                          | VP16AD_RV1         | TTATCCCGACCCGGGAATCCCC               |

\* Minakuchi et al. *Dev. Biol.* **325**, 341-350 (2009).

**Supplementary Table S2. List of primers and templates used for dsRNA and qPCR**

| Target gene and primer name | template        | Nucleotide sequence (5' to 3')                   |
|-----------------------------|-----------------|--------------------------------------------------|
| dsRNA                       |                 |                                                  |
| <i>TcMet</i>                |                 |                                                  |
| TcMet_dsRNA_FW              | pGEM-T_TcMet*   | GGATCCTAATACGACTCACTATAGGGACGACCAGGGAACTGTTGAAAG |
| TcMet_dsRNA_RV              |                 | GGATCCTAATACGACTCACTATAGGCGACGGTTCGGTTTGTGTGTTAC |
| <i>TcSRC</i>                |                 |                                                  |
| TcSRC_dsRNA_FW              | pCR4Blunt-TOPO_ | GGATCCTAATACGACTCACTATAGGCTAAGCCGCCACGGTGG       |
| TcSRC_dsRNA_RV              | TcSRC_ORF       | GGATCCTAATACGACTCACTATAGGGACAGAGGTAGTAGATCGCGTC  |
| <i>MalE</i>                 |                 |                                                  |
| MalE_dsRNA_FW               | pMAL-c4E (NEB)  | TGATTGCTGCTGACGGGGT                              |
| MalE_dsRNA_RV               |                 | TTTCTGGCGTTTTCCATAGTGG                           |
| qPCR                        |                 |                                                  |
| <i>TcKr-h1</i>              |                 |                                                  |
| TcKrh1_qPCR_FW              | cDNA            | GTTTGCTCCAAGGGGTTACAG                            |
| TcKrh1_qPCR_RV              |                 | GGTTGTAGCCGAAGGATTTGCC                           |
| <i>TcMet</i>                |                 |                                                  |
| TcMet_qPCR_FW               | cDNA            | CATTGCAGGTTATATGACTGAGGAAGTGT                    |
| TcMet_qPCR_RV               |                 | GAGTAAACGGTAACATGATGATCCTTTGCT                   |
| <i>TcSRC</i>                |                 |                                                  |
| TcSRC_qPCR_FW               | cDNA            | ACGAGACCGTGGAGGAGAAGCA                           |
| TcSRC_qPCR_RV               |                 | AACTTTGTCCCTGTGCGAAATCC                          |
| <i>TcRp49</i>               |                 |                                                  |
| TcRp49_qPCR_FW              | cDNA            | CAGGCACCAGTCTGACCGTTATG                          |
| TcRp49_qPCR_RV              |                 | GCTTCGTTTTGGCATTGGAGC                            |

\* Minakuchi et al. *Dev Biol* **325**, 341-350 (2009).

**Supplementary Table S3. List of primers, methods, and templates used for construction of reporter plasmids**

| Reporter plasmid name | Construction method | PCR template          | Primer name       | Nucleotide sequence (5' to 3')                  |
|-----------------------|---------------------|-----------------------|-------------------|-------------------------------------------------|
| pGL4.14_-477/+1883    | Gateway system      | Genomic DNA           | TcKrh1_Pro_F1     | AAAAAGCAGGCTNNGTTGCACTCGCTAATTACCTCAACCAGATAAC  |
|                       |                     |                       | TcKrh1_Pro_R1     | AGAAAGCTGGGTNCGGGGCTGCAGACGACTTTCTTTACTG        |
| pGL4.14_-477/+106     | Inverse PCR         | pGL4.14_-477/+1883    | TcKrh1_ProiPCR_F1 | ATCAAGATCTGGCCTCGGGCGCCAAG                      |
|                       |                     |                       | TcKrh1_ProiPCR_R1 | AATTTCTCAGGTTTGGAGACCTGTGTGTC                   |
| pGL4.14_+106/+1883    | Inverse PCR         | pGL4.14_-477/+1883    | TcKrh1_ProiPCR_F2 | GTAAGTTTTTATTTTACTTATCAAAAATTTCTTTTTTCTGGGCTTGG |
|                       |                     |                       | TcKrh1_ProiPCR_R2 | ATCCTCGAGGCTAGCGAGCTCAGGTAC                     |
| pGL4.14_-477/+1883_M1 | Inverse PCR         | pGL4.14_-477/+1883    | TcKrh1_ProiPCR_F3 | TTTAAACCGTTTCAACACGGGCCAGACTGTTC                |
|                       |                     |                       | TcKrh1_ProiPCR_R3 | TTTAAAAGTACTAGGGATTTTGGATTTCGTTTGTGTTAATAAAC    |
| pGL4.14_-477/+1883_M2 | Inverse PCR         | pGL4.14_-477/+1883    | TcKrh1_ProiPCR_F4 | TTTAAAATGACTTGGGCACGCACGCTCGTG                  |
|                       |                     |                       | TcKrh1_ProiPCR_R4 | TTTAAAGAGTGTCGGCCGGTTTTTACAACGATC               |
| pGL4.14_-477/+1883_M3 | Inverse PCR         | pGL4.14_-477/+1883_M1 | TcKrh1_ProiPCR_F5 | TTTAAAATGACTTGGGCACGCACGCTCGTG                  |
|                       |                     |                       | TcKrh1_ProiPCR_R5 | TTTAAAGAGTGTCGGCCGGTTTTTACAACGATC               |
| pGL4.14_-477/+106_M1  | Inverse PCR         | pGL4.14_-477/+106     | TcKrh1_ProiPCR_F6 | TTTAAACCGTTTCAACACGGGCCAGACTGTTC                |
|                       |                     |                       | TcKrh1_ProiPCR_R6 | TTTAAAAGTACTAGGGATTTTGGATTTCGTTTGTGTTAATAAAC    |
| pGL4.14_+106/+1883_M1 | Inverse PCR         | pGL4.14_+106/+1883    | TcKrh1_ProiPCR_F7 | TTTAAAATGACTTGGGCACGCACGCTCGTG                  |
|                       |                     |                       | TcKrh1_ProiPCR_R7 | TTTAAAGAGTGTCGGCCGGTTTTTACAACGATC               |

Red letters indicate mutated nucleotides
